# Supplementary material for: Life-Threatening Malnutrition in Very Severe ME/CFS
Source: PubMed Central journal article supplement (PMC8070213; doi:10.3390/healthcare9040459), 2021-04-14
Supplement: healthcare-09-00459-s001.pdf [file healthcare-09-00459-s001.pdf]

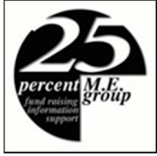

## ENTERAL AND PARENTERAL FEEDING QUESTIONNAIRE

Are You:- [Circle all that apply]

**NG Fed go to Section 1**

**NJ Fed go to Section 2**

**PEG Fed go to Section 3**

**PEJ Fed go to Section 4**

**On TPN go to Section 5**

**Everyone needs to complete Section 6**

### **Section 1 NG Fed members only**

Age \_\_\_\_\_

How long did you have ME before being NG fed ? \_\_\_\_\_

Reasons for NG Feeding \_\_\_\_\_

\_\_\_\_\_

How long have you been NG fed? \_\_\_\_\_

Hospital \_\_\_\_\_

Consultant Gastroenterologist \_\_\_\_\_

Who manages your tube on a daily basis i.e., flushing/ aspirating?

\_\_\_\_\_

Who oversees the care of the tube and your nutrition in the community?

\_\_\_\_\_

When the tube needs replacing where does this take place?

---

Is there a plan in place for the replacement e.g. elective resiting?

---

**Section 2 NJ Fed members only**

Age -----

How long did you have ME before being NJ fed? \_\_\_\_\_

Reasons for NJ Feeding \_\_\_\_\_

---

How long have you been NJ fed? \_\_\_\_\_

Hospital \_\_\_\_\_

Consultant Gastroenterologist \_\_\_\_\_

Who manages your tube on a daily basis e.g. flushing?

---

Who oversees the care of the tube and your nutrition in the community?

---

When the tube needs replacing where does this take place?

---

Is there a plan in place for the replacement e.g. elective re-siting? \_\_\_\_\_

Are you NJ fed due to gastroparesis? \_\_\_\_\_

Have you been tested for / diagnosed with Mast Cell Activation Disorder ? If "YES" to the above, circle as appropriate

**Section 3 PEG Fed members only**

Age \_\_\_\_\_

Hospital \_\_\_\_\_

Consultant Gastroenterologist \_\_\_\_\_

How long did you have ME for before any form of tube feeding commenced? \_\_\_\_\_

How long did you have ME before being PEG fed? \_\_\_\_\_

Were you NG fed before being PEG fed? \_\_\_\_\_

If so, why was the decision made to site a PEG? \_\_\_\_\_

\_\_\_\_\_

Reasons for PEG Feeding \_\_\_\_\_

How long have you been PEG fed? \_\_\_\_\_

Who manages your tube on a daily basis e.g. flushing/ aspirating?

\_\_\_\_\_

Who oversees the care of the tube and your nutrition in the community?

---

**Section 4 PEJ Fed members only**

Age \_\_\_\_\_

Hospital \_\_\_\_\_

Consultant Gastroenterologist \_\_\_\_\_

How long did you have ME for before any form of tube feeding commenced? \_\_\_\_\_

How long have you been PEJ fed? \_\_\_\_\_

What other forms of tube feeding were tried prior to PEJ feeding? \_\_\_\_\_

Why and by whom was it decided you needed a PEJ? \_\_\_\_\_

---

Who manages your tube on a daily basis e.g. flushing?

---

Who oversees the care of the tube and your nutrition in the community?

---

Are you PEJ fed due to gastrointestinal failure? \_\_\_\_\_

Have you been tested for / diagnosed with Mast Cell Activation Disorder? If 'YES' to

the above, circle as appropriate

## **Section 5 Total Parenteral Nutrition**

Age \_\_\_\_\_

Hospital \_\_\_\_\_

Consultant Gastroenterologist \_\_\_\_\_

How long did you have ME for before any form of tube feeding commenced? \_\_\_\_\_

How long have you been on TPN? \_\_\_\_\_

What other forms of tube feeding were tried prior to TPN? \_\_\_\_\_

How long were they tried for and why were they stopped? \_\_\_\_\_

\_\_\_\_\_

Were you allowed to become underweight whilst different types of tube feeding were tried?

\_\_\_\_\_

Who manages your central line on a daily basis?

\_\_\_\_\_

Are you on TPN due to gastrointestinal failure? \_\_\_\_\_

Have you been tested for / diagnosed with Mast Cell Activation Disorder? If "YES" to the above, circle as appropriate

**Section 6 All enteral / parenteral fed members**

Have you been assessed by SALT? \_\_\_\_\_

Were you diagnosed with an unsafe swallow? \_\_\_\_\_

Were you allowed to become underweight prior to tube feeding commencing? \_\_\_\_\_

Was your inability to eat ever considered to be anorexia nervosa? \_\_\_\_\_

Were you ever threatened with sectioning prior to tube feeding commencing? \_\_\_\_\_

Do you feel your health has improved by being tube fed? \_\_\_\_\_

Any other relevant information: - \_\_\_\_\_

---

---

---

---

---

---

---

---

---

---

---

Thank you for taking the time to complete the questionnaire.

June 2019
